# Supplementary material for: XenDB: Full length cDNA prediction and cross species mapping in Xenopus laevis
Source: PubMed Central journal article supplement (PMC1261260; doi:10.1186/1471-2164-6-123), 2005-09-14

Vmatch Clustering of 317,242 *X.laevis* ESTs:  
number of clusters and singletons

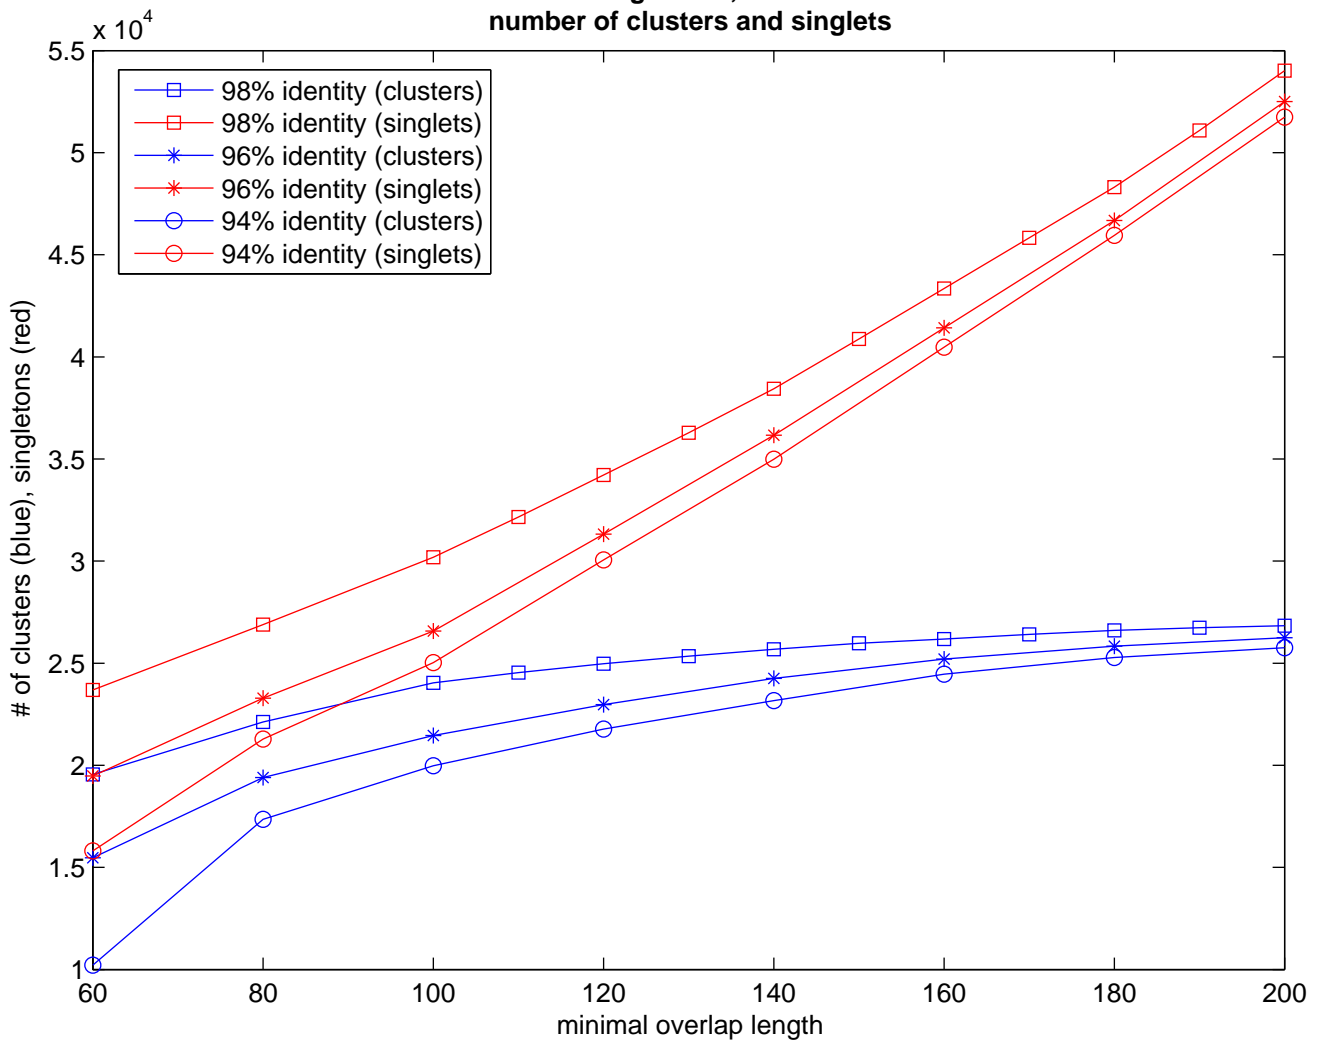

Supplement: 1471-2164-6-123-S1.pdf [file 1471-2164-6-123-S1.pdf]
